# Supplementary material
Source: MDPI journal article supplement (https://www.mdpi.com/2072-4292/14/1/93)
Supplement: s1 [file s1]

**Table S1.** Table of sensitivity analysis of the artificial neural network models for PMI estimation.

| Model     | GDD | Green | NIR | Red | Red Edge | NDRE | NDVI | NLI | SR | Cigreen | Cireg | MNLireg | MSRreg | NLIreg | SRreg |
|-----------|-----|-------|-----|-----|----------|------|------|-----|----|---------|-------|---------|--------|--------|-------|
| Irrigated |     |       |     |     |          |      |      |     |    |         |       |         |        |        |       |
| RBF       | 1   | 2     | 6   | 4   | 3        | -    | -    | 8   | -  | -       | 5     | -       | -      | 7      | -     |
| MLP       | 3   |       |     | 8   | 6        | -    | -    |     | -  | 7       | 4     | -       | 2      | 5      | 1     |
| Rainfed   |     |       |     |     |          |      |      |     |    |         |       |         |        |        |       |
| RBF       | 1   | -     | -   | -   | -        | -    | -    | -   | -  | -       | -     | -       | -      | 2      | 3     |
| MLP       | 1   | -     | -   | -   | 3        | -    | 5    | -   | -  | -       | -     | -       | -      | 4      | 2     |
| Overall   |     |       |     |     |          |      |      |     |    |         |       |         |        |        |       |
| RBF       | 1   | -     | -   | 7   | 5        | -    | 4    | 6   | 3  | 2       | -     | -       | -      | -      | -     |
| MLP       | 1   | -     | -   | 8   | -        | 3    | 7    | -   | 2  | -       | 5     | 9       | 4      | 6      | -     |
